# Supplementary material for: Cobalt and lithium recovery from spent LiCoO 2 using a free-standing potassium zinc hexacyanoferrate/carbon cloth composite electrode
Source: Royal Society of Chemistry journal article supplement (doi:10.1039/d4qi01752h), 2024-01-01
Supplement: d4qi01752h1.pdf [file d4qi01752h1.pdf]

# Electronic Supplementary Information (ESI)

## **Cobalt and lithium recovery from spent LiCoO<sub>2</sub> using a free-standing potassium zinc hexacyanoferrate/carbon cloth composite electrode**

Mengxiang Ye, Huaimeng Li,\* Xi Wu, Guofeng Zhang, and Yunxia Zhang\*

*Key Laboratory of Materials Physics, Centre for Environmental and Energy Nanomaterials, Anhui*

*Key Laboratory of Nanomaterials and Nanotechnology, Institute of Solid State Physics, Hefei*

*Institutes of Physical Science, Chinese Academy of Sciences, Hefei 230031, China.*

---

\* Correspondence Author. Email: [hmeli@issp.ac.cn](mailto:hmeli@issp.ac.cn); [yxzhang@issp.ac.cn](mailto:yxzhang@issp.ac.cn)

## Supplementary Figures

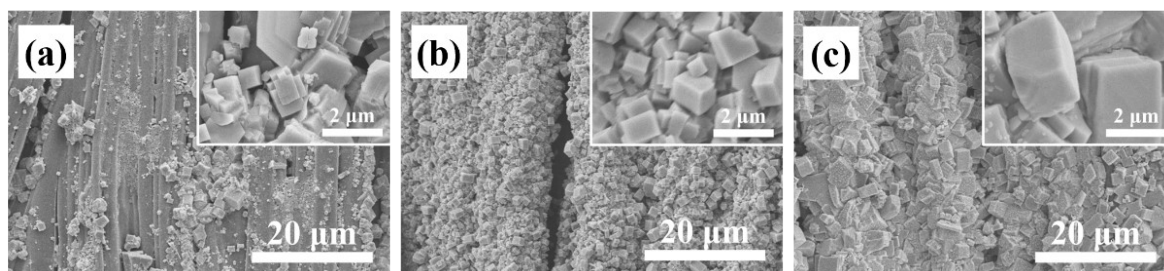

**Fig. S1** SEM images of (a) CC/KZHCF-1, (b) CC/KZHCF-3 and (c) CC/KZHCF-4.

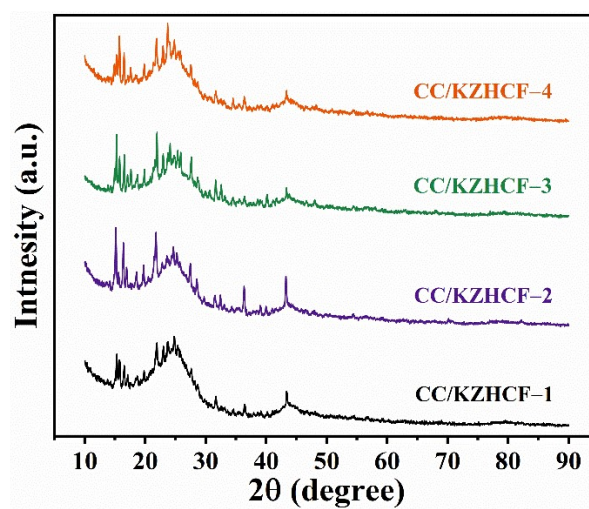

**Fig. S2** XRD patterns of the as-synthesized CC/KZHCF-1, CC/KZHCF-2, CC/KZHCF-3 and CC/KZHCF-4.

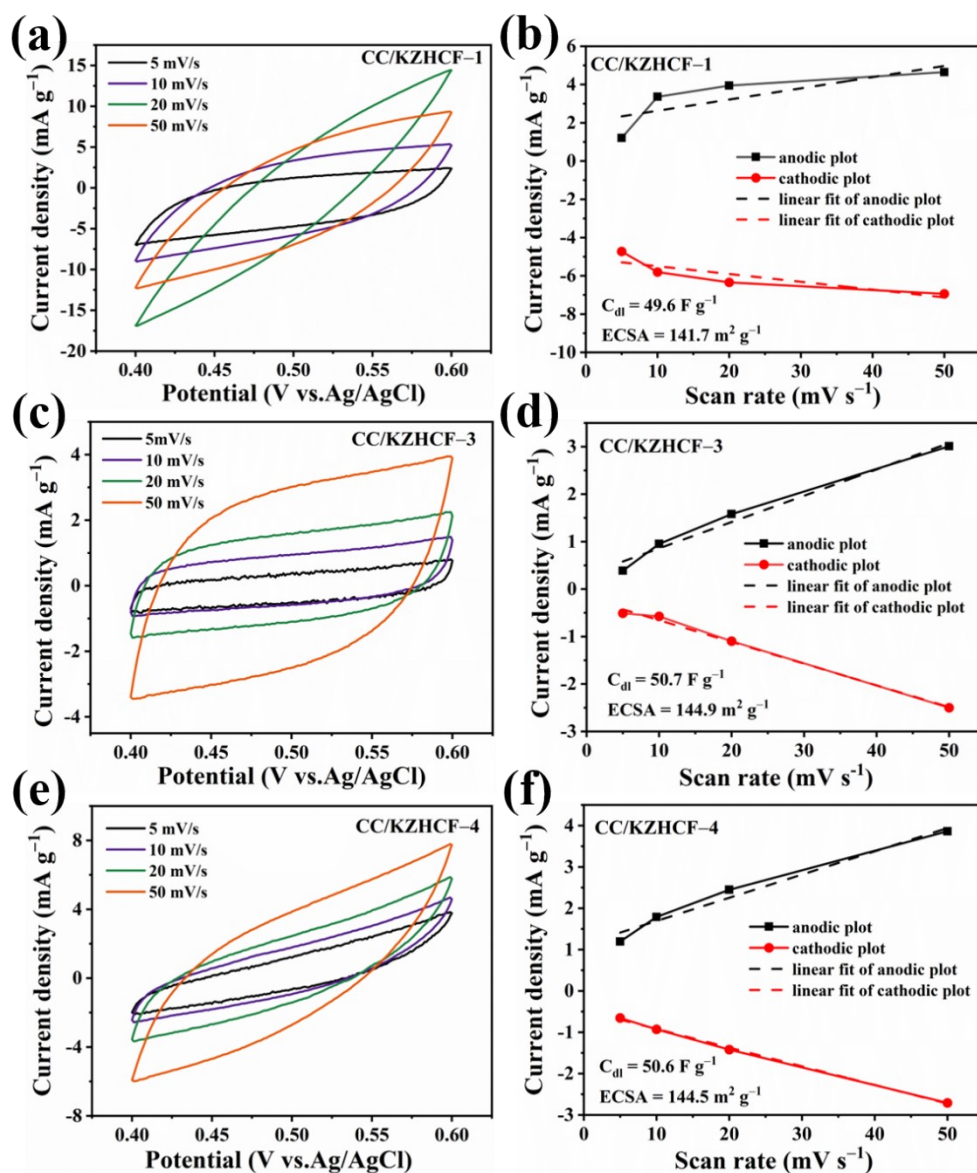

**Fig. S3** CV curves at different scan rates between 0.40 and 0.60 V (vs. Ag/AgCl) of (a) CC/KZHCF-1, (c) CC/KZHCF-3 and (e) CC/KZHCF-4. The corresponding cathodic and anodic charging current measured at 0.50 V (vs. Ag/AgCl) plotted as a function of scan rates of (b) CC/KZHCF-1, (d) CC/KZHCF-3 and (f) CC/KZHCF-4.

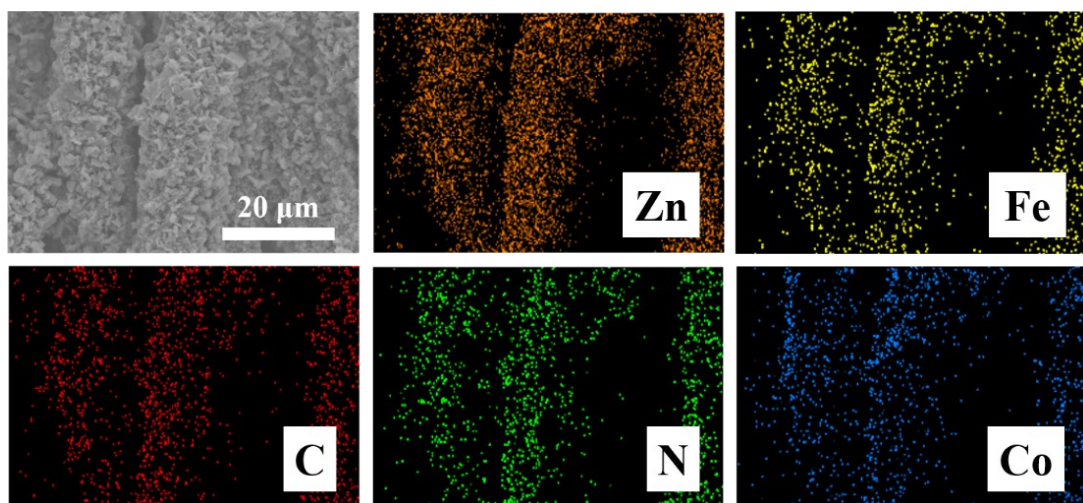

**Fig. S4** EDS elemental mappings of CC/KZHCF-2 electrode after  $\text{Co}^{2+}$  electrosorption.

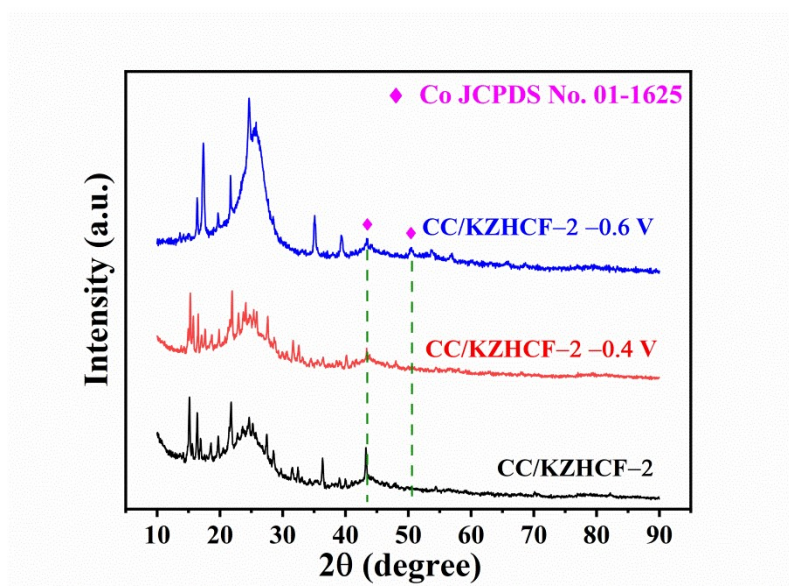

**Fig. S5** XRD patterns of CC/KZHCF-2 electrodes before and after  $\text{Co}^{2+}$  electrosorption under  $-0.4$  V and  $-0.6$  V (vs. Ag/AgCl) potentials.

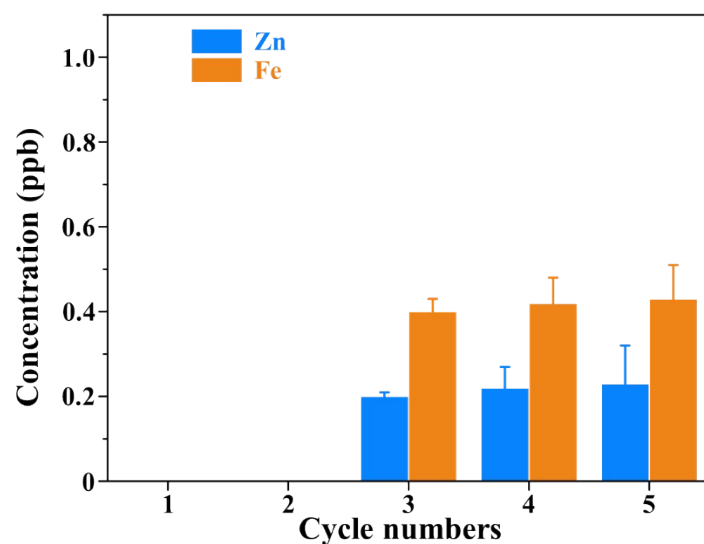

**Fig. S6** Concentration of metal ions released from the CC/KZHCF electrode after five cycles.

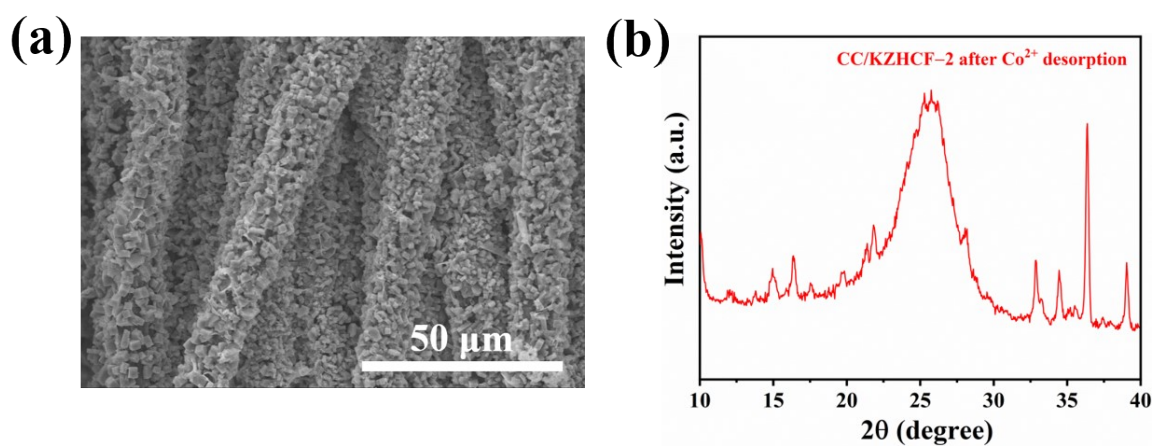

**Fig. S7** (a) SEM image and (b) XRD pattern of CC/KZHCF electrode after  $\text{Co}^{2+}$  desorption.

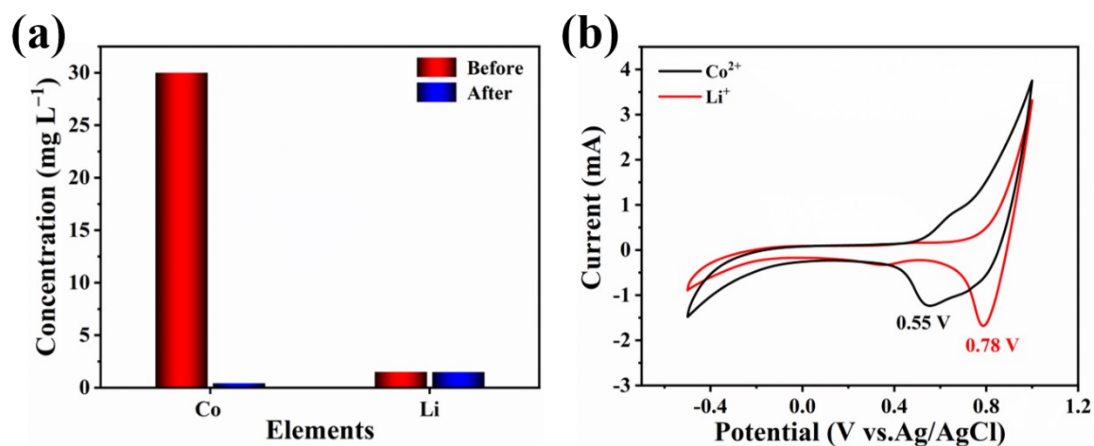

**Fig. S8** (a) Concentrations of Co<sup>2+</sup> and Li<sup>+</sup> ions in the spent LiCoO<sub>2</sub> leachate before and after electroadsorption; (b) CV curves of CC/KZHCF-2 electrode in 50 mM Co<sup>2+</sup> or Li<sup>+</sup> solution at a scan rate of 50 mV/s, respectively.

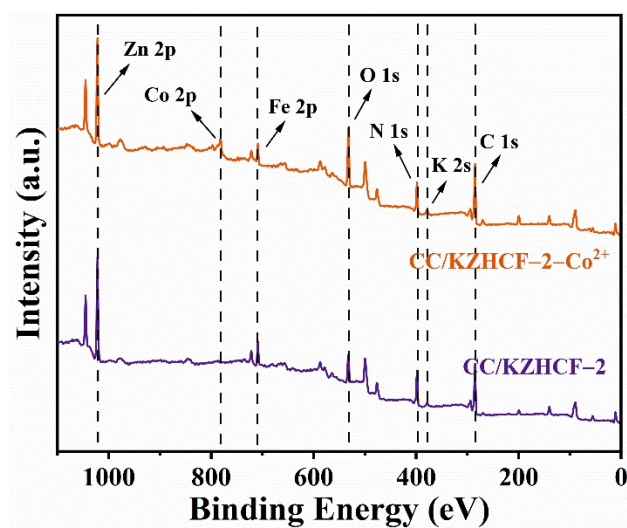

**Fig. S9** XPS spectra of CC/KZHCF-2 electrode before and after Co<sup>2+</sup> electroadsorption.

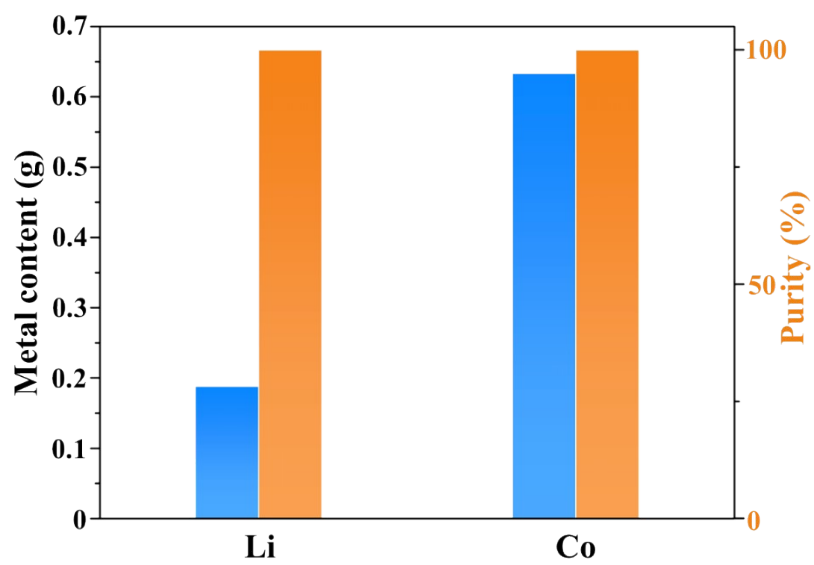

**Fig. S10** Metal content and purity of recycled  $\text{Li}_2\text{CO}_3$  and  $\text{Co}(\text{OH})_2$ .
